1 **TITLE**

2 **Route-dependent spatial engram tagging in mouse dentate gyrus**

3

4 **AUTHORS**

5 \*Wilmerding, Lucius K.<sup>1,2,3</sup>, Kondratyev, Ivan<sup>1</sup>, Ramirez, Steve<sup>1,2,3</sup>, Hasselmo, Michael  
6 E.<sup>1,2,3</sup>

7

8 **AFFILIATIONS**

9 <sup>1</sup>Center for Systems Neuroscience, Boston University

10 <sup>2</sup>Graduate Program for Neuroscience, Boston University

11 <sup>3</sup>Department of Psychological and Brain Sciences, Boston University

12

13 \* Corresponding Author: lwilmerd@bu.edu

14

15 **Highlights**

- 16 • Immediate-early-gene labeling strategy revealed spatial navigation ensembles in  
17 DG
- 18 • Sub-ensembles encode separate maze routes within a larger task context
- 19 • Ensemble reactivation does not correlate with behavioral variables

20

21 **SUMMARY**

22 The dentate gyrus (DG) of hippocampus is hypothesized to act as a pattern separator  
23 that distinguishes between similar input patterns during memory formation and retrieval.  
24 Sparse ensembles of DG cells associated with learning and memory, i.e. engrams, have  
25 been labeled and manipulated to recall novel context memories. Functional studies of DG  
26 cell activity have demonstrated the spatial specificity and stability of DG cells during  
27 navigation. To reconcile how the DG contributes to separating global context as well as  
28 individual navigational routes, we trained mice to perform a delayed-non-match-to-  
29 position (DNMP) T-maze task and labeled DG neurons during performance of this task  
30 on a novel T-maze. The following day, mice navigated a second environment: the same  
31 T-maze, the same T-maze with one route permanently blocked but still visible, or a novel  
32 open field. We found that the degree of engram reactivation across days differed based  
33 on the traversal of maze routes, such that mice traversing only one arm had higher  
34 ensemble overlap than chance but less overlap than mice running the full two-route task.  
35 Mice experiencing the open field had similar ensemble sizes to the other groups but only  
36 chance-level ensemble reactivation. Ensemble overlap differences could not be  
37 explained by behavioral variability across groups, nor did behavioral metrics correlate to  
38 degree of ensemble reactivation. Together, these results support the hypothesis that DG

39 contributes to spatial navigation memory and that partially non-overlapping ensembles  
40 encode different routes within the context of different environments.

41

42 **Keywords**

43 Hippocampus, Engram tagging, Immediate Early Gene, Delayed Non-Match to Position,  
44 Context, Spatial Navigation

45

## 46 1. INTRODUCTION

47  
48 The dentate gyrus (DG), a subregion of the hippocampal formation, is  
49 hypothesized to act as a pattern separator that distinguishes between similar input  
50 patterns during memory formation and retrieval (Marr, 1971; McNaughton & Morris, 1987;  
51 O'Reilly & McClelland, 1994; Treves & Rolls, 1994; Hasselmo & Wyble, 1997; Leutgeb et  
52 al., 2007; Neunuebel & Knierim, 2014). Sparse ensembles of DG memory-associated  
53 granule cells, or engram cells, have been optogenetically targeted to successfully  
54 influence memory-associated behavior (Liu et al., 2012; Ramirez et al., 2013; Denny et  
55 al., 2014; Redondo et al., 2014) even after consolidation (Kitamura et al., 2017) and  
56 pathogenic aging leading to natural recall failure (Roy et al., 2016). These findings support  
57 the hypothesis that the DG encodes the contextual dimension of memories. Another body  
58 of literature emphasizes the spatial representations of DG granule cells, which exhibit  
59 place fields similar to those in CA1 (O'Keefe & Dostrovsky, 1971; Neunuebel & Knierim,  
60 2012, 2014; GoodSmith et al., 2017; Hainmueller & Bartos, 2018; Cholvin et al., 2021).  
61 Lesions of the DG granule cell population impair spatial memory (McLamb et al., 1988;  
62 McNaughton et al., 1989; Nanry et al., 1989; Xavier et al., 1999; for a review, see Xavier  
63 & Costa, 2009) and reduce both spatial specificity of CA3 place cells and reward-  
64 associated sharp-wave-ripple rate (Sasaki et al., 2018). Reconciling how the DG  
65 contributes to both novel contextual learning and spatial representations would offer  
66 important insight into the contribution of this region for learning and memory.

67 To that end, our study investigated the role of the DG in distinguishing between  
68 multiple routes within a single T-maze context during a spatial navigation task. Male and  
69 female mice were trained on a delayed-non-match-to-position (DNMP) task with two  
70 routes. A population of active DG granule cells was visualized using an immediate-early-  
71 gene strategy of labeling cFos positive cells active during exposure on Day 1 to a novel  
72 2-route T-maze (Guzowski et al., 1999; Reijmers et al., 2007; Liu et al., 2012; Ramirez et  
73 al., 2013). Another population of cFos positive cells activated on Day 2 by a second  
74 behavioral context was visualized with immunohistochemical staining for comparison. We  
75 hypothesized that the DG of mice exposed to a 1-route maze on Day 2 would show more  
76 overlap between the two cell populations than chance, but less overlap than mice re-  
77 exposed to the full 2-route maze from Day 1. Our findings support this hypothesis and  
78 additionally reveal the size and degree of ensemble reactivation are largely independent  
79 of behavioral performance in the arenas. Our results indicate that the DG plays a role in  
80 encoding particular sub-routes of a 2D environment during ongoing spatial navigation.

## 81 82 2. METHODS

83

## 84 2.1 Subjects

85 25 wildtype (WT) C57B6J male and female mice (Jax) were segregated by sex  
86 and group-housed prior to surgery. They received food and water ad libitum and were  
87 placed on a diet containing 40 mg/kg doxycycline (dox; Bio-Serv) at least 1 week prior to  
88 surgery at the age of 17-36 weeks. Post-surgically, the mice were housed in pairs (by  
89 sex) on a reverse 12 hour light-dark cycle. Mice were split equally into groups using  
90 random assignment, counterbalancing for sex. All procedures related to mouse care and  
91 treatment were in accordance with Boston University and National Institutes of Health  
92 guidelines for the Care and Use of Laboratory animals.

93

## 94 2.2 Viral constructs and packaging

95 The AAV-cFos-tTA and AAV-cFos-tTa-TRE-eYFP were constructed as described  
96 previously (Ramirez et al., 2013) and sourced from Gene Therapy Center and Vector  
97 Core at the University of Massachusetts Medical School. The viral titrations were  $1.5 \times 10^{13}$   
98 genome copy per mL for AAV-cFos-tTA-TRE-eYFP and  $1.5 \times 10^{13}$  genome copy per mL  
99 for AAV-cFos-tTA.

100

## 101 2.3 Stereotactic injection

102 All surgeries were performed under stereotactic guidance and all coordinates are  
103 reported relative to bregma. Anesthesia was induced with 5.0% isoflurane and maintained  
104 thereafter at a concentration of 1.5-2.0%. Bilateral burr holes were made at -2.2 mm (AP)  
105 and +/-1.3 (ML) using a 0.5mm drill to allow a 10uL nanofil syringe (World Precision  
106 Instruments) to be lowered to 2.0 mm (DV). 300nL of AAV virus cocktail was injected  
107 bilaterally at a rate of 100nL/min controlled by a MicroSyringe Pump Controller (World  
108 Precision Instruments). Following injection, the needle was kept at the injection site for 5  
109 minutes and slowly withdrawn afterwards. Bone wax was gently inserted into the burr  
110 holes to seal the skull, and two to three sterile sutures were used to close the wound.  
111 Post-operative subcutaneous injections of Buprenorphine (0.1 mg/kg) and Ketoprofen (5  
112 mg/kg) were administered for three days following surgery and Enrofloxacin (10 mg/kg)  
113 for five days post-surgically.

114

## 115 2.4 Behavioral assays and engram tagging

116 All behavioral assays were performed during the light cycle of the day (7:00 -  
117 18:00) on animals 17-32 weeks old. Mice were handled 2-5 min per day for two days  
118 before behavioral training. To increase training motivation, mice were water restricted  
119 during the training period, tagging and re-exposure period to 20 minutes of *ad libitum*  
120 water access daily, in addition to sucrose consumed in the maze.

121 Behavior was run in a two-arm T-maze, as previously described (Fig. 1; [Levy et al., 2021](#)).  
122 The paradigm consisted of a sampling phase and a testing phase, separated  
123 by a 15-second delay period in a closed-off start box. During the sampling phase, mice

124 were forced to run a particular arm of the maze by the application of a barrier closing off  
125 the other reward arm. In the following test phase, mice were allowed to choose either arm  
126 and reward was only delivered for choosing the opposing arm to the preceding sample  
127 phase. Each mouse received five, 15-minute sessions of pre-training on the DNMP  
128 paradigm with gradually increasing delay in the week prior to surgery. Five additional  
129 training sessions of the same length, with full 15-second delay, were delivered after  
130 surgical recovery. All of these initial training sessions were carried out in the training  
131 maze, Context T: a grey, wooden, rectangular T-maze (66 cm long x 31 cm wide x 19 cm  
132 high), with opaque walls forming the central stem and different wall cues on each reward  
133 arm.

134 During the tagging window, mice were taken off dox for 48 hours and subsequently  
135 performed the DNMP paradigm in a novel T-maze, referred to as Context A: a beige,  
136 triangular, linoleum-lined T-maze (78 cm long x 78 cm wide x 18 cm high) with novel cue  
137 cards on the walls of the reward arms. The maze location, odor and floor texture were  
138 also changed relative to Context T. Context A had no walls on the stem, allowing mice to  
139 see the entire arena even when reward arm barriers were present. All mice were exposed  
140 to Context A for 20 minutes, with a minimum of ten DNMP trials performed. Immediately  
141 after tagging, the mice were placed back on dox for the remainder of the study. The  
142 following day, mice were pseudo-randomly split into three groups, counterbalancing for  
143 sex. The first group ran the full T-maze in Context A under the DNMP paradigm discussed  
144 above, for 20 minutes. The second group ran for 20 minutes on a one-sided route inside  
145 the same physical maze and at the same room position as Context A, but with the other  
146 arm blocked by opaque barriers (Fig. 2C, Context B). The mice in this group were evenly  
147 split between the left and right Half-T routes via pseudorandom assignment and were  
148 counterbalanced by sex. The third group was placed in a novel arena at the same room  
149 position as Contexts A and B and explored for 20 minutes without reward. This Open  
150 Field Context C was an empty, opaque gray box (41.5 cm long x 39.5 cm wide x 28.5 cm  
151 high) with no top.

152 Deeplabcut (Mathis et al., 2018) was used to extract mouse position during  
153 behavioral trials from 50fps video recorded on an overhead Mako G-131c GigE camera  
154 (Allied Vision). Video timestamps, spatially scaled position, distance, and velocity  
155 information were extracted using the CMBHome framework  
156 (<https://github.com/hasselmonians/CMBHOME/wiki>).

157

## 158 2.5 Immunohistochemistry.

159 Mice were euthanized 90 minutes after final behavior on Day 2 by administration  
160 of Euthasol (390 mg/kg) and anesthetized with Isoflurane prior to transcardial perfusion  
161 with saline and 10% formalin. Extracted brains were kept in formalin for 48 to 72 hours at  
162 4 °C and transferred to 30% sucrose solution for approximately 72 hours at 4 °C to undergo  
163 cryoprotection. Cohorts included tissue from animals in all three groups, such that fixation

164 and cryoprotection times were matched across groups. Brains were sliced using a  
165 cryostat into 50 $\mu$ m slices, and blocked for 2 hours at 4 °C in 1x phosphate-buffered-saline  
166 + 2% Triton (PBS-T) and 5% normal goat serum (NGS). Consistent with prior studies  
167 (Chen et al., 2019) slices were incubated for 48 hours at 4 °C with primary antibodies  
168 diluted in 5% NGS in PBS-T as follows: rabbit anti-cFos (1:1000, Abcam, #190289) and  
169 chicken anti-GFP (1:1000, ThermoFisher, #A10262). Subsequently, the slices were  
170 washed three times for 10 minutes in PBS-T, followed by a 2 hour incubation in the  
171 secondary antibodies diluted in 5% NGS in PBS-T as follows: Alexa 555 goat anti-rabbit  
172 (1:200; ThermoFisher, #A21429) and Alexa 488 goat anti-chicken (1:200, ThermoFisher,  
173 #A11039). Finally, the slices were mounted on slides using VECTASHIELD® Hardset™  
174 Antifade Mounting Medium with DAPI (Vector Labs, #H-1500) and sealed with nail polish.  
175

## 176 2.6 Image Acquisition

177 Images were acquired with an FV10i confocal laser-scanning microscope, using  
178 60x magnification / 1.4 NA oil-immersion objective. For each image, three z-slices,  
179 separated by approximately 19.5 $\mu$ m, were acquired. The first z-slice was positioned at  
180 the lowest in-focus portion of the sample, the second was positioned at the center of the  
181 sample and the first was positioned at the highest in-focus portion of the imaged sample.  
182 The depth between the slices has been adjusted accordingly to ensure this composition,  
183 but was never set below 17  $\mu$ m to minimize the potential of imaging the same cell in  
184 different z-planes. DAPI was acquired at 405nm with average laser power of 17.4% (SEM  
185 1.43%), eYFP at 473nm with average laser power of 2.38% (SEM 0.17%) and cFos at  
186 559nm with average laser power of 12.21% (SEM 0.40%). Before acquiring each image,  
187 the laser power of each channel (R, G, B) was configured to yield approximately  
188 equivalent intensity between all slices. To ensure images were collected with similar  
189 parameters across groups, we tested the laser power of each image on each channel  
190 across groups and found no significant differences in laser power between groups (Fig.  
191 1A). Each image was acquired as a series of 1024x1024 pixel tiles which were  
192 subsequently stitched together to produce the final image  
193 (<https://imagej.net/plugins/image-stitching>). Only one set of stitching parameters was  
194 used, ensuring any stitching artefacts were consistent across groups. The images used  
195 16 bit-depth encoding and all image processing was handled in ImageJ / FIJI  
196 (<https://imagej.nih.gov/ij/>) with the Bioformats toolbox ([https://imagej.net/formats/bio-](https://imagej.net/formats/bio-formats)  
197 [formats](https://imagej.net/formats/bio-formats)).



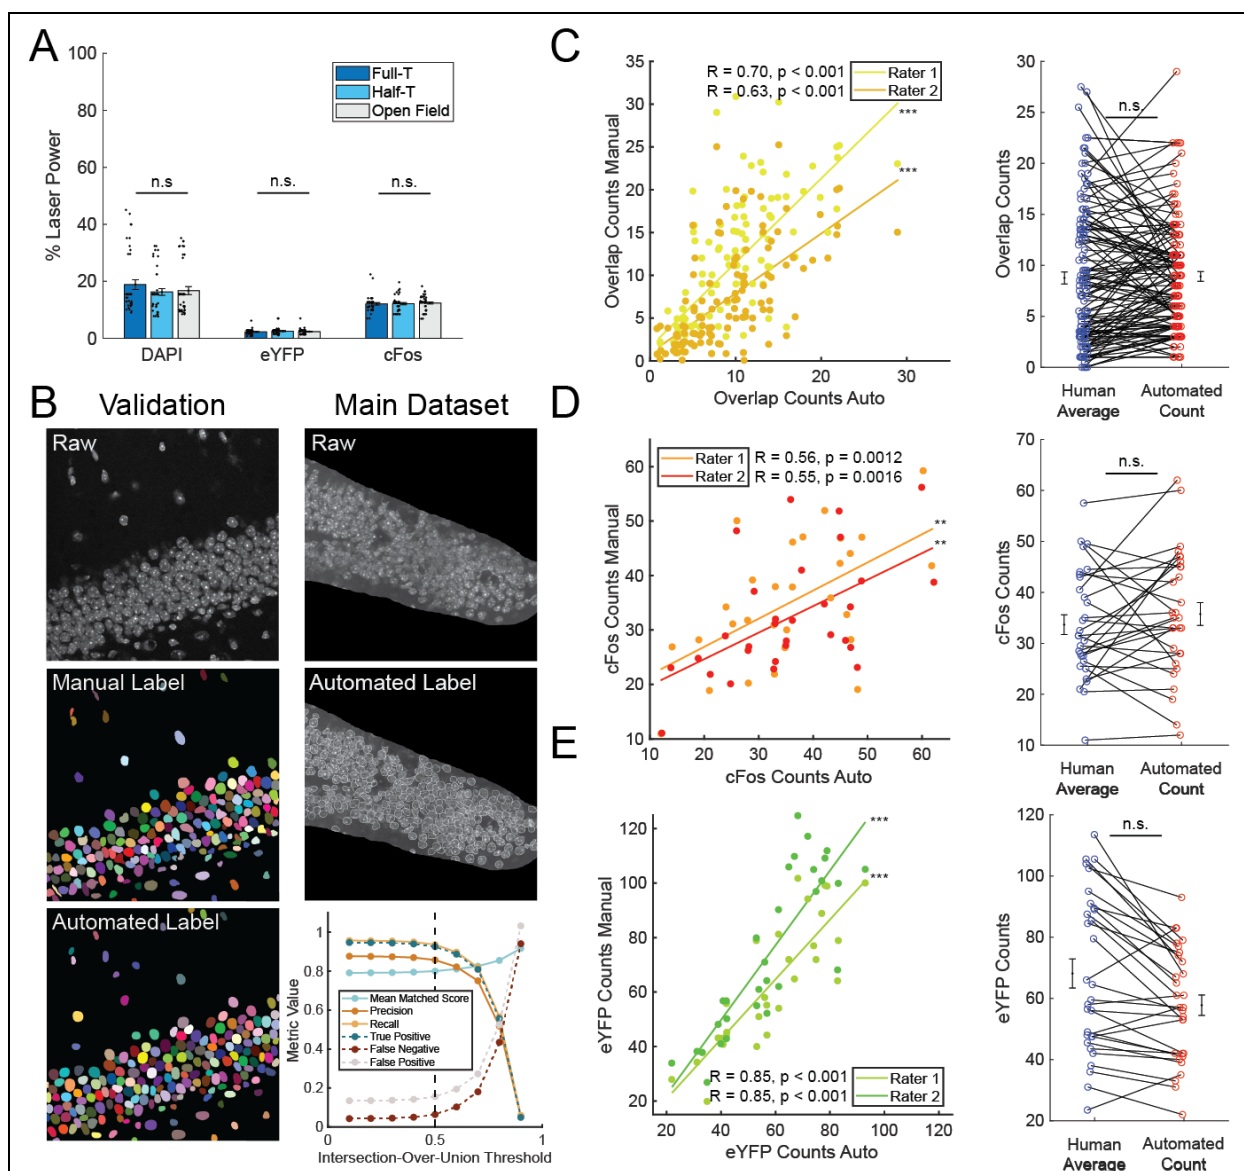

**Figure 1.** Similarity of cell counts supports the use of automated counting methods.

**A)** Comparison of average laser power used during image acquisition across groups. No difference in power was found in the DAPI ( $F_{(2,122)} = 0.83$ ,  $p = 0.44$ ), eYFP ( $F_{(2,122)} = 0.66$ ,  $p = 0.52$ ) or cFos ( $F_{(2,122)} = 0.21$ ,  $p = 0.81$ ) channels,  $n = 40$  images for Full-T and Half-T, 45 images for Open Field.

**B)** Automated DAPI cell counts. Raw, manual label and automated label example from the training validation set. Colors for visualization purpose only. Raw and automated label example from the main data set. Bottom right: model validation metrics demonstrating high precision, accuracy, and matching to ground truth labels over a range of matching thresholds. Dashed black line indicates threshold used in dataset. True Positive, Negative, and False Negative rates shown normalized to ground truth.

**C)** Left: Automated overlap counts strongly correlate with human raters. Pearson's  $r$  and  $p$  values reported in figure. Right: no difference was found between average overlap counts of human raters and automated counting methods ( $t = -0.19$ ,  $p = 0.85$ ).  $n = 125$  images.

**D)** Left: Same as C but for cFos counts. Right: No difference in human or automated counting of cFos ( $t = -0.70$ ,  $p = 0.47$ ).  $n = 30$  images.

**E)** Left: Same as D but for eYFP counts. Right: No difference in human or automated counting of eYFP ( $t = 1.79$ ,  $p = 0.079$ ).

Error bars represent  $\pm$  SEM. Scatter plots denote individual image samples jittered for clarity.

## 199 2.7 Cell Counting

200 Image acquisition was performed only on slices with successful targeting to the  
201 dorsal DG. cFos+ and eYFP+ cells in the upper and lower DG blades were counted using  
202 five 50um coronal slices of dorsal DG in each animal. Cell counts from each of the three  
203 z-planes were summed for that slice and averaged across slices for each mouse. DAPI  
204 was counted using a StarDist neural network trained and validated on a subset of the  
205 data (Fig 1B, [Schmidt et al., 2018](#); [Weigert et al., 2020](#)). Segmentation metrics (precision,  
206 recall, and matching to ground truth labels) confirmed model performance over a range  
207 of label matching thresholds. An intersection-over-union threshold of 0.5% was used as  
208 a tradeoff between match score and other metrics. The number of cFos+ and eYFP+ cells  
209 in the DG region was quantified using an automated ImageJ pipeline that carried out  
210 iterative thresholding followed by exclusion of non-circular objects  
211 ([https://mcib3d.frama.io/3d-suite-imagej/plugins/Segmentation/3D-Iterative-](https://mcib3d.frama.io/3d-suite-imagej/plugins/Segmentation/3D-Iterative-Segmentation/)  
212 [Segmentation/](#)). Parameters were calibrated to include cells even where stitched images  
213 showed intensity variability. In order to quantify the number of overlapping cFos+ and  
214 eYFP+ cells, an automated algorithm was used to carry out pairwise comparisons  
215 between the pixels of each eYFP and cFos cell and the results were filtered to only include  
216 overlapping cells of a comparable size (within at least 50% of each-other's size) that were  
217 mostly overlapping (85% of smaller object). The accuracy of the automatic counter was  
218 verified against a manually scored dataset created by two experimenters blind to the  
219 experimental conditions (Fig. 1C-E). Automated counts were used for increased  
220 reproducibility. Statistical chance for overlap was calculated as  $\frac{eYFP+}{DAPI} * \frac{cFos+}{DAPI}$  and  
221 compared against the counted overlaps normalized to the whole dentate population as  
222  $\frac{cFos+ \& eYFP+}{DAPI}$ .

223

## 224 2.8 Statistical Analysis

225 Bar graphs are reported as means +/- SEM. One way and mixed effects ANOVA  
226 tests were used to assess group differences for both cell counts and behavior, and follow-  
227 up comparisons made where appropriate using independent T-tests (Tukey's HSD).  
228 Repeated measures comparisons including overlap against statistical chance were  
229 performed using paired t-tests while all other comparisons were made with independent  
230 t-tests. Bonferroni-Holm corrected p-values are reported where multiple t-test  
231 comparisons are made. Correlations were run using Pearson's R. Two mice were  
232 excluded (1 Full-T, 1 Half-T) from velocity and distance comparisons (Fig. 4C,D) on the  
233 basis of corrupted video files but were otherwise included for all other tests. Test statistics,  
234 groups sizes, and p-values are reported in figure legends. All tests were performed in  
235 Matlab using publicly available functions. For all figures, \* = p < 0.05, \*\* = p < 0.01, \*\*\* =  
236 p < 0.001.

237



238 [2.9 Data Availability](#)

239 All relevant data supporting the findings of this study are available from the  
240 corresponding author upon reasonable request.

241

## 242 3. RESULTS

243

244 To investigate cells in Dentate Gyrus (DG) associated with spatial navigation  
245 memories, we trained mice on a delayed-non-match-to-position (DNMP) task (Fig. 2A). A  
246 dox-inducible viral labeling strategy was used to selectively label cFos+ DG cells  
247 associated with learning (Fig. 2B). After pre-training and surgical recovery, dox diet was  
248 removed from the cage and mice were exposed to a novel T-maze (Context A) in which  
249 they performed the DNMP task for 20 minutes (Fig. 2C). The mice were returned to dox  
250 to prevent off-target labeling and exposed on the following day to another environment in  
251 the same position with respect to room cues as Context A. The first group (Full-T)  
252 repeated the DNMP behavior in Context A as before. The second group was returned to  
253 the same physical arena as Context A, but with one arm permanently blocked (Context  
254 B). This arena was otherwise similar with respect to timing delays and sucrose rewards  
255 and allowed mice visual access to the other side of the maze. The final group was  
256 exposed to a novel open field arena without reward contingency (Context C).

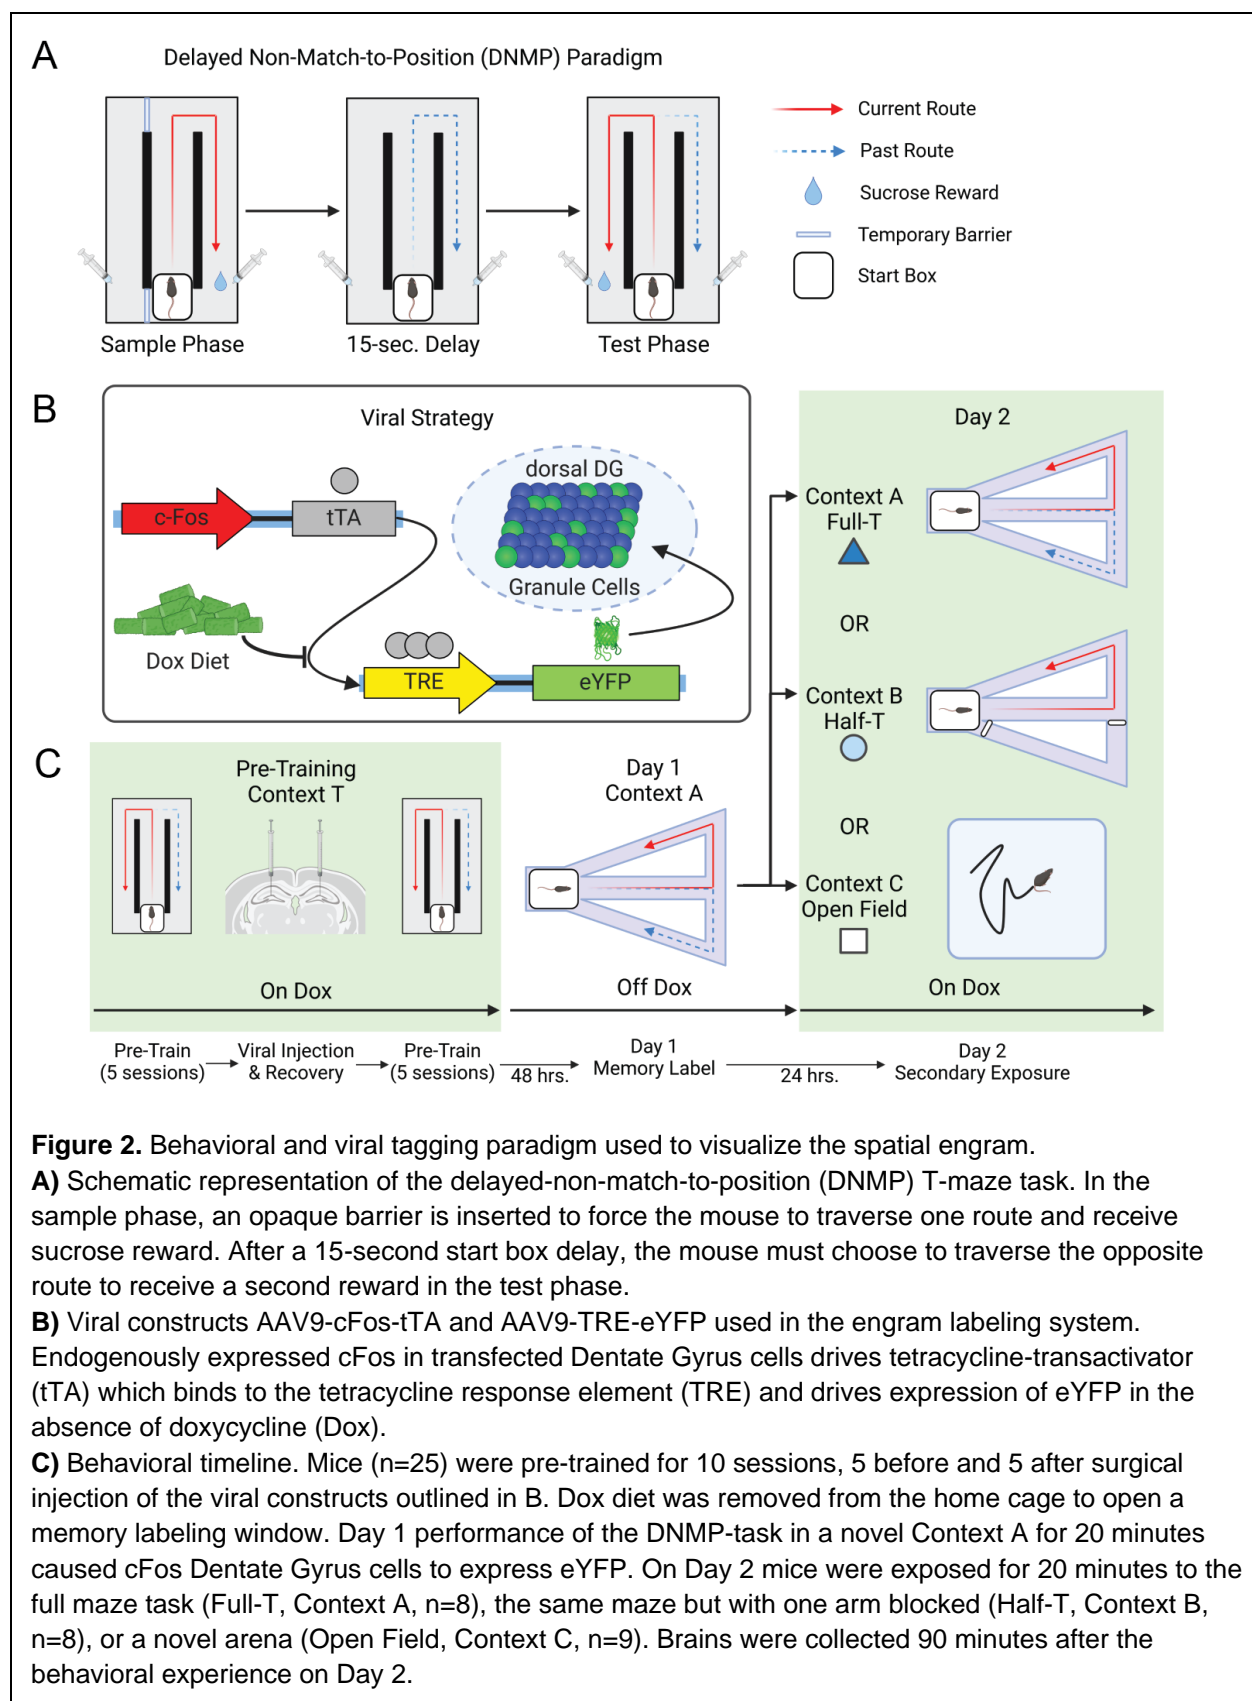

258 We first examined the size and degree of overlap between DG cell ensembles to  
259 determine the level of representational similarity across days in each group.  
260 Immunohistochemical staining revealed two populations, the first from the Day 1  
261 experience (eYFP) and the second from the Day 2 experience (cFos) with partial  
262 reactivation (overlap; Fig. 3A-F). Performance of the DNMP T-maze task on Day 1 yielded  
263 similar ensemble size across groups as expected (Fig. 4A). Interestingly, no difference  
264 was found in Day 2 ensemble size across groups despite the Open Field group  
265 experiencing a novel environment.

266 Next, we normalized the number of overlapping cells to the whole dentate  
267 population and compared each group to statistical chance. This allowed testing of the  
268 primary hypothesis of the experiment as summarized in Figure 4B. Both the Full-T and  
269 Half-T exposures resulted in significantly overlapping populations, while the Open Field  
270 exposure did not (Fig. 4B). Additionally, we found a dissociation of reactivation level  
271 across groups, with the Full-T experiencing highest overlap and Open Field experiencing  
272 the least (Fig. 4B). These results suggest an effect of both novelty and trajectory  
273 experience on the recruitment and reactivation of the DG spatial engram ensemble.

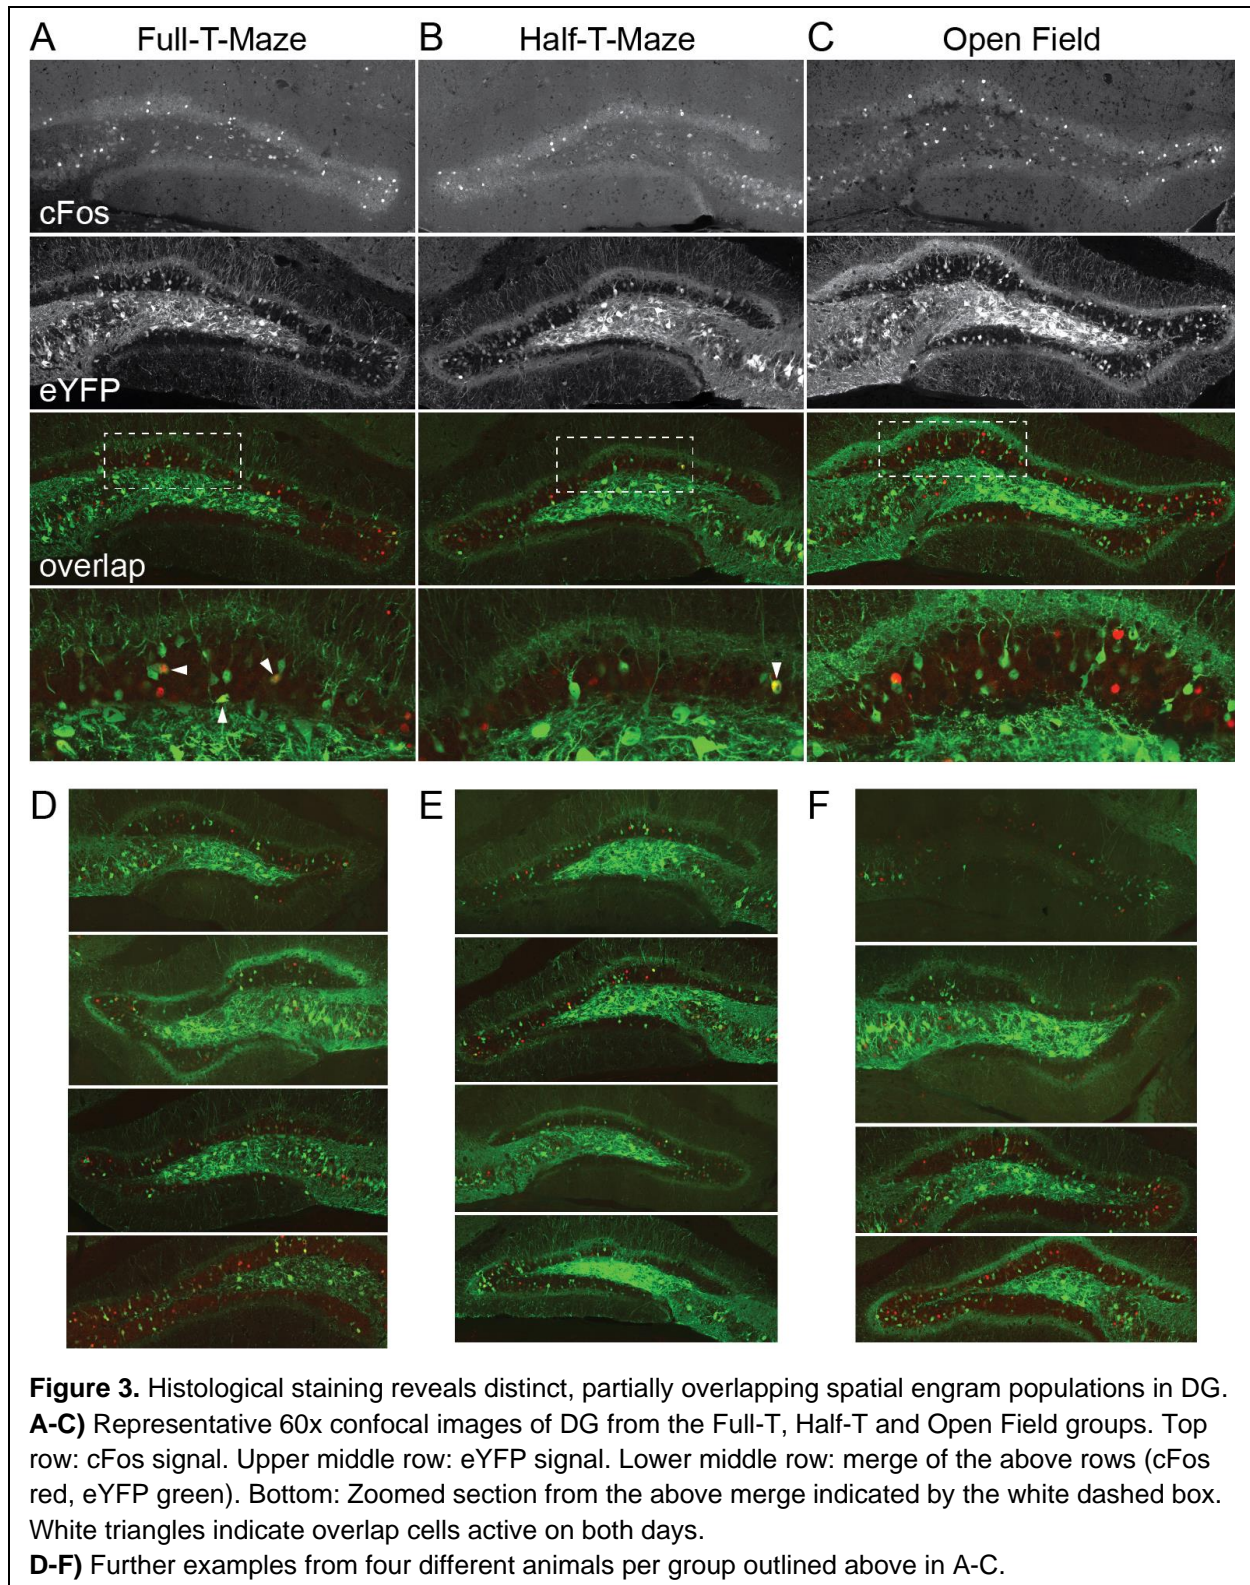



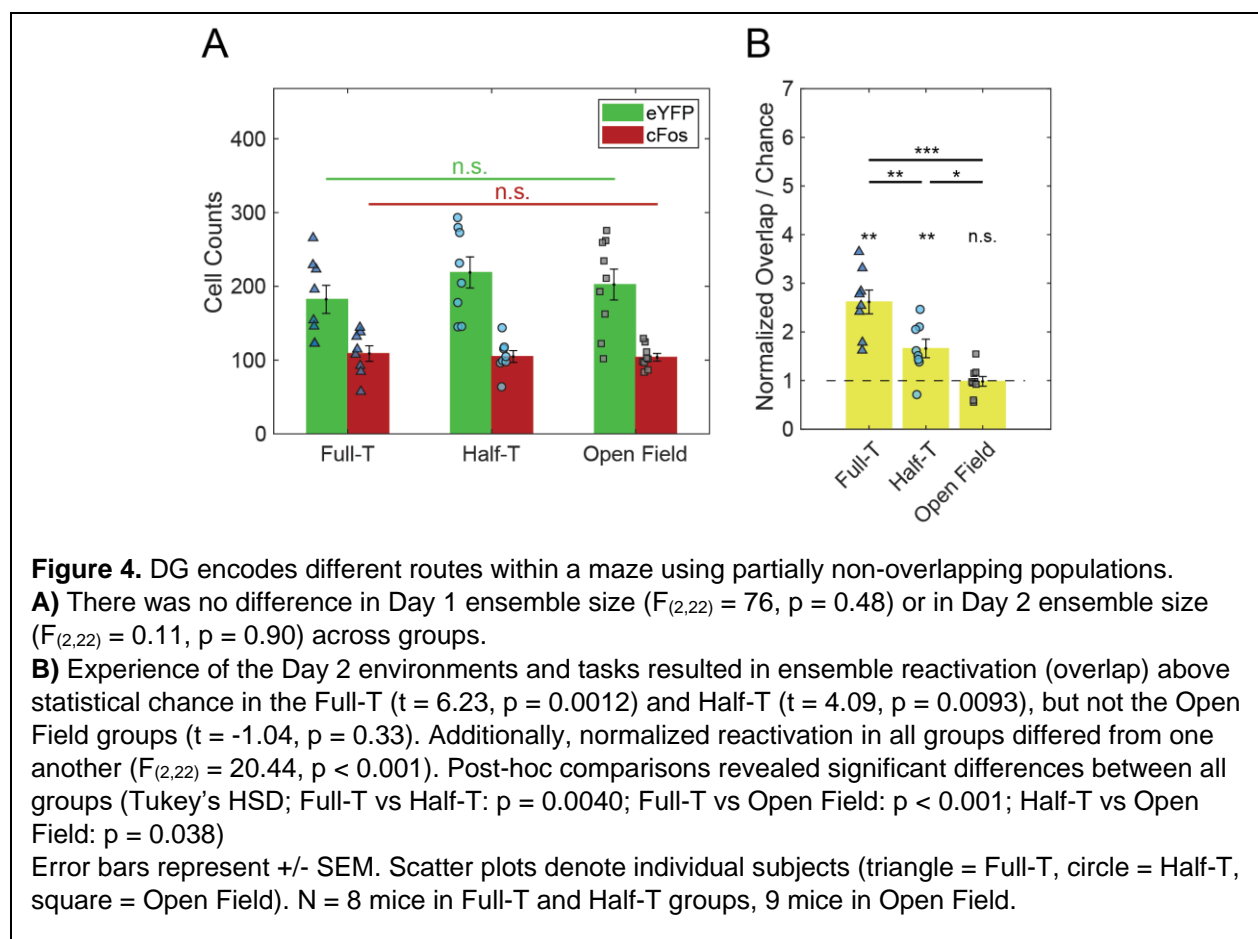

275  
276  
277  
278  
279  
280  
281  
282  
283  
284  
285  
286  
287  
288  
289  
290  
291  
292  
293

To rule out the possibility of confounding effects such as task engagement, laps traversed, and behavioral activity level on engram ensemble recruitment, we analyzed behavior across groups. All groups performed the task above chance nor did we find a difference in accuracy across groups on Day 1 (Fig. 5A). There was no change in accuracy across days for the Full-T group. These data demonstrate that the mice grasped the task and transferred learning successfully from training Context T to the novel Context A. Next, we examined the number of laps, defined as a trajectory from the start box to the reward then back to the start box, across groups and days. While the Full-T and Half-T groups did not differ in Day 2 laps, the Half-T group performed significantly fewer laps on Day 2 compared to Day 1 baseline (Fig. 5B), possibly reflecting a shift to a different behavioral demand (Satvat et al., 2011). For a more general comparison of behavior, we analyzed total distance traveled and average running speed in all groups across days. We found a main effect of day but no effect of group or interaction in either metric (Fig. 5C,D). Anecdotally, we observed mice in the Half-T condition on Day 2 actively investigating the barrier at the choice point which could explain the reduced lap number in some animals even while the distance traveled and average running speed remained constant across groups on Day 2. To follow up this result, we tested for possible correlations between ensemble reactivation and behavior. No correlation was found



294 between the normalized ensemble overlap and any behavioral metric (task accuracy,  
 295 number of laps, distance, or average speed) on Day 1 or Day 2 in any group (Fig. 6A-D).  
 296 These analyses suggest that the degree of engram reactivation is not a result of trajectory  
 297 length or self-motion cues, but is instead related to behavioral contingencies and  
 298 experienced trajectories, as hypothesized.

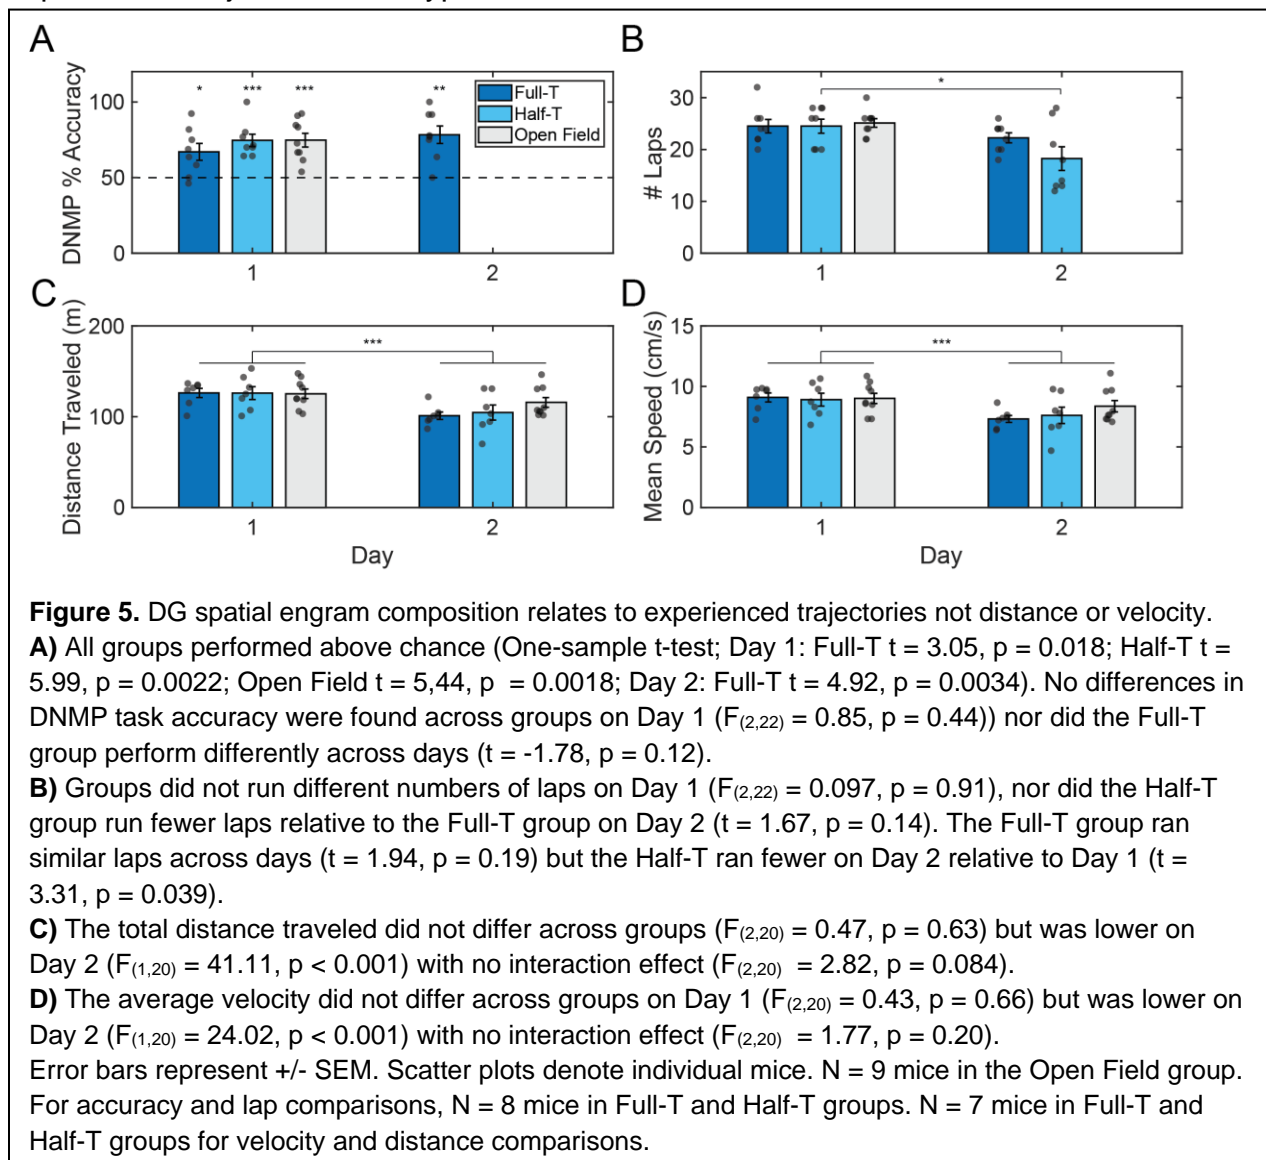

299  
 300 Finally, we examined our data broken down by subject sex and direction of the  
 301 maze experienced in the Half-T group. While each group lacked sufficient number of  
 302 subjects for rigorous comparison by sex within groups, observationally we saw little  
 303 difference in average Day 1 or Day 2 ensemble size or in normalized engram reactivation  
 304 (Fig. 7A). At the behavioral level, male and female mice exhibited little difference in any  
 305 behavioral metric on either day (Fig. 7B). In the Half-T group, we observed minimal  
 306 difference between the Left-T and Right-T subgroups at either the ensemble level (Fig.  
 307 7C) or the behavioral level (Fig. 7D). These similarities were used as grounds to combine

308 animals by sex and by Half-T subgroup in the previous analyses, although follow up  
 309 studies with larger group sizes would be needed to confirm the lack of effect.

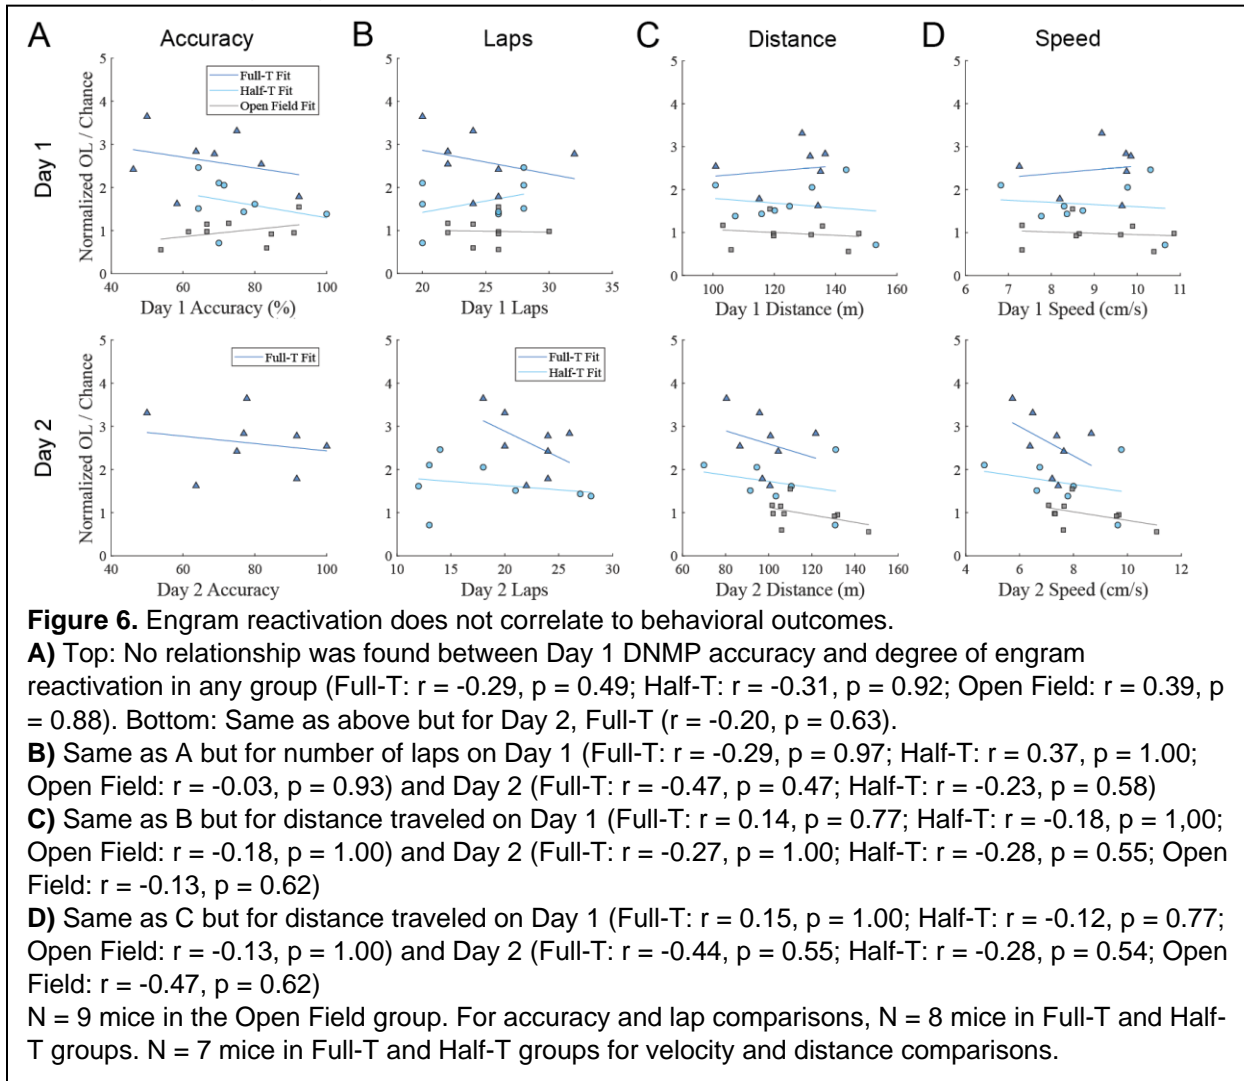

310

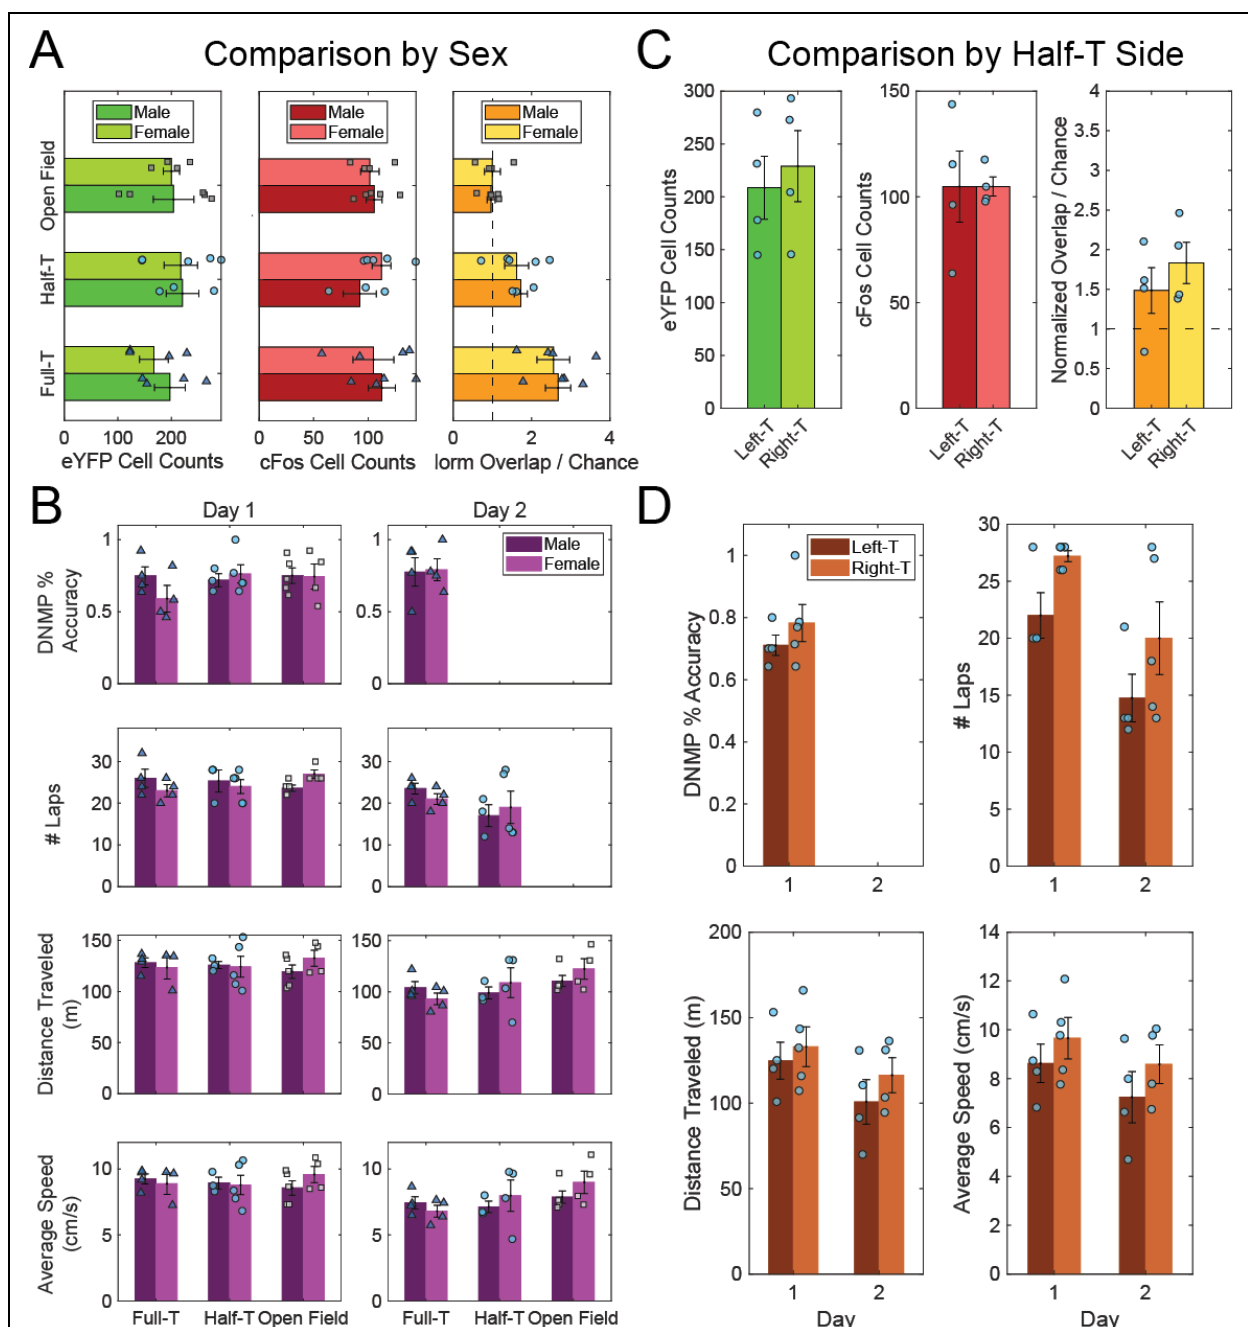

**Figure 7.** Engram composition and behavior does not appear to differ across sex or experienced trajectory in the Half-T group.

- A)** The size of the Day 1 and Day 2 ensembles, as well as degree of reactivation (overlap cells) appears similar between male and female mice of all groups.
- B)** Only minor sex differences were observed for any behavioral metric on either Day 1 (Left) or Day 2 (right) for all groups.
- C)** Same as A but comparing the Left-T and Right-T subgroups in the Half-T group, similarly little difference observed.
- D)** Only minor subgroup differences were observed for behavioral metrics on Day 1 and Day 2. Error bars represent  $\pm$  SEM. Scatter plots denote individual mice.

## 312 4. DISCUSSION

313

314 We trained mice to run a delayed-non-match-to-position (DNMP) T-maze task and  
315 used an activity-dependent viral labeling strategy to visualize cell populations from  
316 different days associated with goal-directed navigation, i.e. spatial engrams. We found  
317 that repeated experience with the same two-route spatial working memory task and  
318 physical location across days yielded the highest degree of engram similarity (Full-T; Fig.  
319 4B). Mice performing a navigation task in the same physical arena and room position but  
320 with only one route (Half-T) showed higher reactivation of the original population than  
321 chance levels, but less than the Full-T group (Fig. 4B). The Open Field group exhibited  
322 the least overlap, no different than chance (Open Field, Fig. 4B). In addition, we observed  
323 no difference in the size of the Day 2 ensemble despite differences in memory demand  
324 and novelty based on the experienced arena (Fig. 4A). Together, these results are  
325 consistent with past studies implicating the DG in spatial memory processing  
326 (McNaughton et al., 1989; Emerich & Walsh, 1990; Xavier et al., 1999), including T-maze  
327 tasks with long delays (Emerich & Walsh, 1989; Costa et al., 2005) and build on previous  
328 applications of immediate early genes (IEGs) to study the overlap of populations involved  
329 in hippocampal spatial and task-specific memories (Guzowski et al., 1999; Satvat et al.,  
330 2011).

331

### 332 4.1 Spatial vs fear engrams

333 We set out to test whether methodologies typically used to label contextual  
334 memories in dorsal DG could be used to probe aspects of navigational memory for  
335 specific routes within a larger environment. Previous studies of memory ensemble, or  
336 engram, composition have largely focused on the formation and reactivation of contextual  
337 memories with strong emotional valence, in particular fear (Liu et al., 2012b; Ramirez et  
338 al., 2013; Redondo et al., 2014; Chen et al., 2019; Sun et al., 2020). However,  
339 physiological recordings from DG during navigation have revealed spatial preferences of  
340 DG granule and mossy cells (Jung & McNaughton, 1993; Leutgeb et al., 2007; Neunuebel  
341 & Knierim, 2012, 2014; GoodSmith et al., 2017, 2022) which may be stable across days  
342 (Hainmueller & Bartos, 2018; Cholvin et al., 2021). While IEGs have been used to  
343 examine cell population reactivation across or within open field navigation contexts  
344 (Guzowski et al., 1999; VanElzakker et al., 2008), this approach could not distinguish an  
345 engram ensemble coding for contextual cues (e.g. odor, distal visual landmarks, etc.)  
346 from one encoding specific navigational trajectories (e.g. serially activated place fields).  
347 In our study, the Half-T group had lower ensemble reactivation than the Full-T group, but  
348 higher reactivation than the Open Field group and statistical chance (Fig. 4B). Some  
349 contribution of pattern separation as a result of differences in behavioral demand between  
350 a spatial reference memory task (Full-T) and a sensory-guided navigation task with similar  
351 delays and rewards (Half-T) is possible (Satvat et al., 2011). However, we found largely

352 no difference in behavior across groups except a small reduction in lap number across  
353 days in the Half-T group, potentially due to some animals actively investigating the barrier  
354 during laps (Fig. 4B). We found largely no correlation between engram reactivation and  
355 behavioral measures (Fig. 5) in agreement with past work showing little relationship  
356 between freezing and fear engram ensemble activity (Zaki et al., 2022) or locomotion and  
357 Fos levels in hippocampus (VanElzakker et al., 2008). Based on these finding and  
358 previous evidence for spatial specificity in DG granule cells, we hypothesize that different  
359 routes are encoded by different spatial engram populations.

360 The relationship between Fos expression, memory encoding, and spatial  
361 correlates of cell activity is complex. One recent study linked the degree of Fos expression  
362 to the reliability and stability place fields in CA1 during familiar task performance (Pettit et  
363 al., 2022). Interestingly, clusters of co-active cells with strong Fos expression exhibited  
364 place fields across large sections of the environment, consistent with prior work in replay  
365 and theta sequences suggesting that correlated cells chunk spatial information (Foster &  
366 Wilson, 2006; Johnson & Redish, 2007; Gupta et al., 2012). Conversely, a previous  
367 engram study using electrophysiology found that cFos tagged CA1 cells displayed strong  
368 contextual firing but poorer spatial stability than non-tagged cells (Tanaka et al., 2018).  
369 One possible explanation for the disparity is the level of experience with the environment,  
370 because cFos is both driven by firing activity and helps maintain spatial coding accuracy  
371 in existing place cells (Pettit et al., 2022). In our study, mice were exposed to novel  
372 environments during tagging, likely driving formation of new engram ensembles similar to  
373 Tanaka et al. However, the animals had extensive pre-training on the task itself and  
374 transferred learning across environments (Fig. 5A). It is therefore unsurprising that the  
375 Full-T group displayed reactivation above chance levels and above the Half-T group,  
376 indicating stability of the cFos tagged ensemble across days despite the novel  
377 environment, in line with the experienced animals and findings of Pettit et al. Follow up  
378 studies could compare ensembles tagged in the training context, or pre-trained versus  
379 naïve mice, to disambiguate the competing factors of pattern completion and pattern  
380 separation on spatial engram recruitment (Nakashiba et al., 2012; Santoro, 2013).  
381 Further, investigating the cellular dynamics in DG during task demand updating (as in the  
382 Half-T group on Day 2) would provide valuable insight into real-time feedback influencing  
383 memory and spatial-associated cell ensembles.

384

#### 385 4.2 Size of the Engram Ensemble

386 cFos IEG expression arises from neural activity and leads to various plasticity-  
387 related changes within a cell (Labiner et al., 1993). Novelty is an important factor for  
388 inducing plasticity in the hippocampus, including DG (McNaughton & Morris, 1987;  
389 Kitchigina et al., 1997; Straube, Korz, & Frey, 2003; Straube, Korz, Balschun, et al., 2003;  
390 Davis et al., 2004). We observed a larger Day 1 ensemble relative to the Day 2 ensemble  
391 in all groups, consistent with a novelty effect in the Full-T and Half-T groups (Fig. 4A) and

392 with prior work using similar techniques (Zaki et al., 2022). However, we made no formal  
393 comparison of this effect due to the difference in cFos detection between IHC and viral  
394 tagging methods and because animals ran less distance and at lower speed on the  
395 second day (Fig. 5C,D). Past work using alternate Fos detection methods similarly  
396 demonstrated increases in DG Fos expression after novel, but not familiar, environmental  
397 exploration (VanElzaker et al., 2008). Interestingly, the Open Field group underwent a  
398 novel context exposure on each day and exhibited a similar Day 2 ensemble size to the  
399 other groups, which suggests an impact not only of novelty but also task in this study (Fig.  
400 4A). Given similar ensemble detection methods to the other groups, we might have  
401 expected the Open Field group to have larger average Day 2 ensemble size, but this was  
402 not the case. The open field free-exploration task has no route constraints by design, and  
403 these mice were just as active as their Full-T and Half-T counterparts (Fig. 5C,D). Thus,  
404 both the navigational memory demand and reward contingencies likely play a role in DG  
405 ensemble recruitment in addition to novelty alone (Costa et al., 2005).

406

#### 407 4.3 Composition of sub-ensembles for pattern separation

408 One question concerns whether the DG contains cells with task-modulated spatial  
409 tuning, i.e. splitter cells, like those observed in CA1 (Wood et al., 2000; Ferbinteanu &  
410 Shapiro, 2003; Griffin et al., 2007; Kinsky et al., 2020). Splitter cells can emerge early in  
411 learning and may be modulated by the turn direction, task phase, or both on the DNMP  
412 T-maze task (Levy et al., 2021). DG place fields remap based on task engagement,  
413 hinting at the flexibility of DG cells within the same physical location (Shen et al., 2021).  
414 Interestingly, CA1 splitter cells appear more stable than classic place fields across days,  
415 which might help to explain increased overlap observed in the Full-T group relative to the  
416 Half-T group which had no chance to demonstrate splitter behavior (Fig 4B; Kinsky et al.,  
417 2020). Splitter cells may indeed serve an additional pattern separation function in DG for  
418 this task by discriminating otherwise similar stem trajectories and improving pattern  
419 completion of orthogonal sub-ensembles coding for separate reward arm routes (O'Reilly  
420 & McClelland, 1994; Wood et al., 2000; Ferbinteanu & Shapiro, 2003; Hasselmo &  
421 Eichenbaum, 2005; Nakashiba et al., 2012; Neunuebel & Knierim, 2012, 2014;  
422 GoodSmith et al., 2017, 2019; Senzai & Buzsáki, 2017; Hainmueller & Bartos, 2018).

423

#### 424 4.4 Conclusion

425 We tested whether experience with specific navigation routes could be dissected  
426 in the dentate gyrus using engram tagging and visualization strategies. We found that  
427 repeated experience of a two-route maze task across days recruited a more similar  
428 ensemble than exposure to a novel open field arena or exposure to a one-route task  
429 within the same T-maze arena. The experimental design offers a means to study aspects  
430 of spatial navigation using traditional engram tagging techniques. Additionally, our results  
431 suggest the dentate gyrus performs its role in pattern separation and spatial navigation



432 by the activation of partially non-overlapping sub-ensembles for different routes in a larger  
433 context.

434

## 435 Acknowledgments

436

437 We thank the Hasselmo and Ramirez labs for thoughtful feedback and  
438 commentary on the work.

439 This work was supported by the National Institutes of Health [grant numbers: R01  
440 MH052090, MH060013, MH120073, HD101402-02; and DP5 OD023106-01], and the  
441 Office of Naval Research [grant numbers: MURI N00014-16-1-2832, N00014-19-1-2571;  
442 and DURIP N00014-17-1-2304].

443

## 444 Author Contributions

445

446 Conceptualization, L.K.W., S.R., and M.E.H.; Methodology, L.K.W. and I.K.;  
447 Investigation, L.K.W. and I.K.; Writing – Original Draft, L.K.W., I.K.; Writing – Review &  
448 Editing, L.K.W., I.K., S.R., and M.E.H.; Funding Acquisition, M.E.H. and S.R.; Formal  
449 Analysis, L.K.W. and I.K.; Visualization, L.K.W.; Supervision, M.E.H. and S.R.

450

## 451 Declaration of Competing Interest

452

453 The authors declare no competing interests.

## 454 References

- 455 Chen, B. K., Murawski, N. J., Cincotta, C., McKissick, O., Finkelstein, A., Hamidi, A. B., Merfeld,  
456 E., Doucette, E., Grella, S. L., Shpokayte, M., Zaki, Y., Fortin, A., & Ramirez, S. (2019).  
457 Artificially Enhancing and Suppressing Hippocampus-Mediated Memories. *Current Biology*,  
458 29(11), 1885-1894.e4. <https://doi.org/10.1016/j.cub.2019.04.065>
- 459 Cholvin, T., Hainmueller, T., & Bartos, M. (2021). The hippocampus converts dynamic  
460 entorhinal inputs into stable spatial maps. *Neuron*, 109(19), 3135-3148.e7.  
461 <https://doi.org/10.1016/j.neuron.2021.09.019>
- 462 Costa, V. C. I., Bueno, J. L. O., & Xavier, G. F. (2005). Dentate gyrus-selective colchicine lesion  
463 and performance in temporal and spatial tasks. *Behavioural Brain Research*, 160(2), 286–303.  
464 <https://doi.org/10.1016/j.bbr.2004.12.011>
- 465 Davis, C. D., Jones, F. L., & Derrick, B. E. (2004). Novel Environments Enhance the Induction  
466 and Maintenance of Long-Term Potentiation in the Dentate Gyrus. *The Journal of*  
467 *Neuroscience*, 24(29), 6497–6506. <https://doi.org/10.1523/JNEUROSCI.4970-03.2004>
- 468 Denny, C. A., Kheirbek, M. A., Alba, E. L., Tanaka, K. F., Brachman, R. A., Laughman, K. B.,  
469 Tomm, N. K., Turi, G. F., Losonczy, A., & Hen, R. (2014). Hippocampal Memory Traces Are  
470 Differentially Modulated by Experience, Time, and Adult Neurogenesis. *Neuron*, 83(1), 189–201.  
471 <https://doi.org/10.1016/j.neuron.2014.05.018>
- 472 Emerich, D. F., & Walsh, T. J. (1989). Selective working memory impairments following  
473 intradentate injection of colchicine: Attenuation of the behavioral but not the neuropathological  
474 effects by gangliosides GM1 and AGF2. *Physiology & Behavior*, 45(1), 93–101.  
475 [https://doi.org/10.1016/0031-9384\(89\)90170-4](https://doi.org/10.1016/0031-9384(89)90170-4)
- 476 Emerich, D. F., & Walsh, T. J. (1990). Cholinergic cell loss and cognitive impairments following  
477 intraventricular or intradentate injection of colchicine. *Brain Research*, 517(1–2), 157–167.  
478 [https://doi.org/10.1016/0006-8993\(90\)91021-8](https://doi.org/10.1016/0006-8993(90)91021-8)
- 479 Ferbinteanu, J., & Shapiro, M. L. (2003). Prospective and Retrospective Memory Coding in the  
480 Hippocampus. *Neuron*, 40(6), 1227–1239. [https://doi.org/10.1016/S0896-6273\(03\)00752-9](https://doi.org/10.1016/S0896-6273(03)00752-9)
- 481 Foster, D. J., & Wilson, M. A. (2006). Reverse replay of behavioural sequences in hippocampal  
482 place cells during the awake state. *Nature*, 440(7084), Article 7084.  
483 <https://doi.org/10.1038/nature04587>
- 484 GoodSmith, D., Chen, X., Wang, C., Kim, S. H., Song, H., Burgalossi, A., Christian, K. M., &  
485 Knierim, J. J. (2017). Spatial Representations of Granule Cells and Mossy Cells of the Dentate  
486 Gyrus. *Neuron*, 93(3), 677-690.e5. <https://doi.org/10.1016/j.neuron.2016.12.026>
- 487 GoodSmith, D., Kim, S. H., Puliyadi, V., Ming, G., Song, H., Knierim, J. J., & Christian, K. M.  
488 (2022). Flexible encoding of objects and space in single cells of the dentate gyrus. *Current*  
489 *Biology*, 0(0). <https://doi.org/10.1016/j.cub.2022.01.023>
- 490 GoodSmith, D., Lee, H., Neunuebel, J. P., Song, H., & Knierim, J. J. (2019). Dentate Gyrus  
491 Mossy Cells Share a Role in Pattern Separation with Dentate Granule Cells and Proximal CA3  
492 Pyramidal Cells. *The Journal of Neuroscience*, 39(48), 9570–9584.  
493 <https://doi.org/10.1523/JNEUROSCI.0940-19.2019>

- 494 Griffin, A. L., Eichenbaum, H., & Hasselmo, M. E. (2007). Spatial Representations of  
495 Hippocampal CA1 Neurons Are Modulated by Behavioral Context in a Hippocampus-Dependent  
496 Memory Task. *Journal of Neuroscience*, 27(9), 2416–2423.  
497 <https://doi.org/10.1523/JNEUROSCI.4083-06.2007>
- 498 Gupta, A. S., van der Meer, M. A. A., Touretzky, D. S., & Redish, A. D. (2012). Segmentation of  
499 spatial experience by hippocampal theta sequences. *Nature Neuroscience*, 15(7), 1032–1039.  
500 <https://doi.org/10.1038/nn.3138>
- 501 Guzowski, J. F., McNaughton, B. L., Barnes, C. A., & Worley, P. F. (1999). Environment-specific  
502 expression of the immediate-early gene *Arc* in hippocampal neuronal ensembles. *Nature*  
503 *Neuroscience*, 2(12), 1120–1124. <https://doi.org/10.1038/16046>
- 504 Hainmueller, T., & Bartos, M. (2018). Parallel emergence of stable and dynamic memory  
505 engrams in the hippocampus. *Nature*, 558(7709), 292–296. [https://doi.org/10.1038/s41586-018-](https://doi.org/10.1038/s41586-018-0191-2)  
506 [0191-2](https://doi.org/10.1038/s41586-018-0191-2)
- 507 Hasselmo, M. E., & Eichenbaum, H. (2005). Hippocampal mechanisms for the context-  
508 dependent retrieval of episodes. *Neural Networks*, 18(9), 1172–1190.  
509 <https://doi.org/10.1016/j.neunet.2005.08.007>
- 510 Hasselmo, M. E., & Wyble, B. P. (1997). Free recall and recognition in a network model of the  
511 hippocampus: Simulating effects of scopolamine on human memory function. *Behavioural Brain*  
512 *Research*, 89(1–2), 1–34. [https://doi.org/10.1016/S0166-4328\(97\)00048-X](https://doi.org/10.1016/S0166-4328(97)00048-X)
- 513 Johnson, A., & Redish, A. D. (2007). Neural Ensembles in CA3 Transiently Encode Paths  
514 Forward of the Animal at a Decision Point. *Journal of Neuroscience*, 27(45), 12176–12189.  
515 <https://doi.org/10.1523/JNEUROSCI.3761-07.2007>
- 516 Jung, M. W., & McNaughton, B. L. (1993). Spatial selectivity of unit activity in the hippocampal  
517 granular layer. *Hippocampus*, 3(2), 165–182. <https://doi.org/10.1002/hipo.450030209>
- 518 Kinsky, N. R., Mau, W., Sullivan, D. W., Levy, S. J., Ruesch, E. A., & Hasselmo, M. E. (2020).  
519 Trajectory-modulated hippocampal neurons persist throughout memory-guided navigation.  
520 *Nature Communications*, 11, 2443. <https://doi.org/10.1038/s41467-020-16226-4>
- 521 Kitamura, T., Ogawa, S. K., Roy, D. S., Okuyama, T., Morrissey, M. D., Smith, L. M., Redondo,  
522 R. L., & Tonegawa, S. (2017). Engrams and circuits crucial for systems consolidation of a  
523 memory. *Science*, 356(6333), 73–78. <https://doi.org/10.1126/science.aam6808>
- 524 Kitchigina, V., Vankov, A., Harley, C., & Sara, S. J. (1997). Novelty-elicited, Noradrenaline-  
525 dependent Enhancement of Excitability in the Dentate Gyrus. *European Journal of*  
526 *Neuroscience*, 9(1), 41–47. <https://doi.org/10.1111/j.1460-9568.1997.tb01351.x>
- 527 Labiner, D., Butler, L., Cao, Z., Hosford, D., Shin, C., & McNamara, J. (1993). Induction of c-fos  
528 mRNA by kindled seizures: Complex relationship with neuronal burst firing. *The Journal of*  
529 *Neuroscience*, 13(2), 744–751. <https://doi.org/10.1523/JNEUROSCI.13-02-00744.1993>
- 530 Leutgeb, J. K., Leutgeb, S., Moser, M.-B., & Moser, E. I. (2007). Pattern Separation in the  
531 Dentate Gyrus and CA3 of the Hippocampus. *Science*, 315(5814), 961–966.  
532 <https://doi.org/10.1126/science.1135801>

- 533 Levy, S. J., Kinsky, N. R., Mau, W., Sullivan, D. W., & Hasselmo, M. E. (2021). Hippocampal  
534 spatial memory representations in mice are heterogeneously stable. *Hippocampus*, 31(3), 244–  
535 260. <https://doi.org/10.1002/hipo.23272>
- 536 Liu, X., Ramirez, S., Pang, P. T., Puryear, C. B., Govindarajan, A., Deisseroth, K., & Tonegawa,  
537 S. (2012a). Optogenetic stimulation of a hippocampal engram activates fear memory recall.  
538 *Nature*, 484(7394), 381–385. <https://doi.org/10.1038/nature11028>
- 539 Marr, D. (1971). Simple memory: A theory for archicortex. *Philosophical Transactions of the*  
540 *Royal Society of London. B, Biological Sciences*, 262(841), 23–81.  
541 <https://doi.org/10.1098/rstb.1971.0078>
- 542 Mathis, A., Mamidanna, P., Cury, K. M., Abe, T., Murthy, V. N., Mathis, M. W., & Bethge, M.  
543 (2018). DeepLabCut: Markerless pose estimation of user-defined body parts with deep learning.  
544 *Nature Neuroscience*, 21(9), 1281–1289. <https://doi.org/10.1038/s41593-018-0209-y>
- 545 McLamb, R. L., Mundy, W. R., & Tilson, H. A. (1988). Intradentate colchicine disrupts the  
546 acquisition and performance of a working memory task in the radial arm maze. *Neurotoxicology*,  
547 9(3), 521–528.
- 548 McNaughton, B. L., Barnes, C. A., Meltzer, J., & Sutherland, R. J. (1989). Hippocampal granule  
549 cells are necessary for normal spatial learning but not for spatially-selective pyramidal cell  
550 discharge. *Experimental Brain Research*, 76(3), 485–496. <https://doi.org/10.1007/BF00248904>
- 551 McNaughton, B. L., & Morris, R. G. M. (1987). Hippocampal synaptic enhancement and  
552 information storage within a distributed memory system. *Trends in Neurosciences*, 10(10), 408–  
553 415. [https://doi.org/10.1016/0166-2236\(87\)90011-7](https://doi.org/10.1016/0166-2236(87)90011-7)
- 554 Nakashiba, T., Cushman, J. D., Pelkey, K. A., Renaudineau, S., Buhl, D. L., McHugh, T. J.,  
555 Barrera, V. R., Chittajallu, R., Iwamoto, K. S., McBain, C. J., Fanselow, M. S., & Tonegawa, S.  
556 (2012). Young Dentate Granule Cells Mediate Pattern Separation whereas Old Granule Cells  
557 Contribute to Pattern Completion. *Cell*, 149(1), 188–201.  
558 <https://doi.org/10.1016/j.cell.2012.01.046>
- 559 Nanry, K. P., Mundy, W. R., & Tilson, H. A. (1989). Colchicine-induced alterations of reference  
560 memory in rats: Role of spatial versus non-spatial task components. *Behavioural Brain*  
561 *Research*, 35(1), 45–53. [https://doi.org/10.1016/S0166-4328\(89\)80007-5](https://doi.org/10.1016/S0166-4328(89)80007-5)
- 562 Neunuebel, J. P., & Knierim, J. J. (2012). Spatial Firing Correlates of Physiologically Distinct  
563 Cell Types of the Rat Dentate Gyrus. *Journal of Neuroscience*, 32(11), 3848–3858.  
564 <https://doi.org/10.1523/jneurosci.6038-11.2012>
- 565 Neunuebel, J. P., & Knierim, J. J. (2014). CA3 Retrieves Coherent Representations from  
566 Degraded Input: Direct Evidence for CA3 Pattern Completion and Dentate Gyrus Pattern  
567 Separation. *Neuron*, 81(2), 416–427. <https://doi.org/10.1016/j.neuron.2013.11.017>
- 568 O'Keefe, J., & Dostrovsky, J. (1971). The hippocampus as a spatial map. Preliminary evidence  
569 from unit activity in the freely-moving rat. *Brain Research*, 34(1), 171–175.  
570 [https://doi.org/10.1016/0006-8993\(71\)90358-1](https://doi.org/10.1016/0006-8993(71)90358-1)

- 571 O'Reilly, R. C., & McClelland, J. L. (1994). Hippocampal conjunctive encoding, storage, and  
572 recall: Avoiding a trade-off. *Hippocampus*, 4(6), 661–682.  
573 <https://doi.org/10.1002/hipo.450040605>
- 574 Pettit, N. L., Yap, E.-L., Greenberg, M. E., & Harvey, C. D. (2022). Fos ensembles encode and  
575 shape stable spatial maps in the hippocampus. *Nature*, 1–8. [https://doi.org/10.1038/s41586-](https://doi.org/10.1038/s41586-022-05113-1)  
576 [022-05113-1](https://doi.org/10.1038/s41586-022-05113-1)
- 577 Ramirez, S., Liu, X., Lin, P.-A., Suh, J., Pignatelli, M., Redondo, R. L., Ryan, T. J., & Tonegawa,  
578 S. (2013). Creating a False Memory in the Hippocampus. *Science*, 341(6144), 387–391.  
579 <https://doi.org/10.1126/science.1239073>
- 580 Redondo, R. L., Kim, J., Arons, A. L., Ramirez, S., Liu, X., & Tonegawa, S. (2014). Bidirectional  
581 switch of the valence associated with a hippocampal contextual memory engram. *Nature*,  
582 513(7518), 426–430. <https://doi.org/10.1038/nature13725>
- 583 Reijmers, L. G., Perkins, B. L., Matsuo, N., & Mayford, M. (2007). Localization of a Stable  
584 Neural Correlate of Associative Memory. *Science*, 317(5842), 1230–1233.  
585 <https://doi.org/10.1126/science.1143839>
- 586 Roy, D. S., Arons, A., Mitchell, T. I., Pignatelli, M., Ryan, T. J., & Tonegawa, S. (2016). Memory  
587 retrieval by activating engram cells in mouse models of early Alzheimer's disease. *Nature*,  
588 531(7595), 508–512. <https://doi.org/10.1038/nature17172>
- 589 Santoro, A. (2013). Reassessing pattern separation in the dentate gyrus. *Frontiers in Behavioral*  
590 *Neuroscience*, 7. <https://doi.org/10.3389/fnbeh.2013.00096>
- 591 Sasaki, T., Piatti, V. C., Hwaun, E., Ahmadi, S., Lisman, J. E., Leutgeb, S., & Leutgeb, J. K.  
592 (2018). Dentate network activity is necessary for spatial working memory by supporting CA3  
593 sharp-wave ripple generation and prospective firing of CA3 neurons. *Nature Neuroscience*,  
594 21(2), 258–269. <https://doi.org/10.1038/s41593-017-0061-5>
- 595 Satvat, E., Schmidt, B., Argraves, M., Marrone, D. F., & Markus, E. J. (2011). Changes in Task  
596 Demands Alter the Pattern of zif268 Expression in the Dentate Gyrus. *The Journal of*  
597 *Neuroscience*, 31(19), 7163–7167. <https://doi.org/10.1523/JNEUROSCI.0094-11.2011>
- 598 Schmidt, U., Weigert, M., Broaddus, C., & Myers, G. (2018). Cell Detection with Star-Convex  
599 Polygons. In A. F. Frangi, J. A. Schnabel, C. Davatzikos, C. Alberola-López, & G. Fichtinger  
600 (Eds.), *Medical Image Computing and Computer Assisted Intervention – MICCAI 2018* (pp.  
601 265–273). Springer International Publishing. [https://doi.org/10.1007/978-3-030-00934-2\\_30](https://doi.org/10.1007/978-3-030-00934-2_30)
- 602 Senzai, Y., & Buzsáki, G. (2017). Physiological properties and behavioral correlates of  
603 hippocampal granule cells and mossy cells. *Neuron*, 93(3), 691-704.e5.  
604 <https://doi.org/10.1016/j.neuron.2016.12.011>
- 605 Shen, J., Yao, P.-T., Ge, S., & Xiong, Q. (2021). Dentate granule cells encode auditory  
606 decisions after reinforcement learning in rats. *Scientific Reports*, 11(1), Article 1.  
607 <https://doi.org/10.1038/s41598-021-93721-8>
- 608 Straube, T., Korz, V., Balschun, D., & Uta Frey, J. (2003). Requirement of  $\beta$ -adrenergic receptor  
609 activation and protein synthesis for LTP-reinforcement by novelty in rat dentate gyrus. *The*  
610 *Journal of Physiology*, 552(Pt 3), 953–960. <https://doi.org/10.1113/jphysiol.2003.049452>



- 611 Straube, T., Korz, V., & Frey, J. U. (2003). Bidirectional modulation of long-term potentiation by  
612 novelty-exploration in rat dentate gyrus. *Neuroscience Letters*, *344*(1), 5–8.  
613 [https://doi.org/10.1016/S0304-3940\(03\)00349-5](https://doi.org/10.1016/S0304-3940(03)00349-5)
- 614 Sun, X., Bernstein, M. J., Meng, M., Rao, S., Sørensen, A. T., Yao, L., Zhang, X., Anikeeva, P.  
615 O., & Lin, Y. (2020). Functionally Distinct Neuronal Ensembles within the Memory Engram. *Cell*,  
616 *181*(2), 410–423.e17. <https://doi.org/10.1016/j.cell.2020.02.055>
- 617 Tanaka, K. Z., He, H., Tomar, A., Niisato, K., Huang, A. J. Y., & McHugh, T. J. (2018). The  
618 hippocampal engram maps experience but not place. *Science*.  
619 <https://doi.org/10.1126/science.aat5397>
- 620 Treves, A., & Rolls, E. T. (1994). Computational analysis of the role of the hippocampus in  
621 memory. *Hippocampus*, *4*(3), 374–391. <https://doi.org/10.1002/hipo.450040319>
- 622 VanElzaker, M., Fevurly, R. D., Breindel, T., & Spencer, R. L. (2008). Environmental novelty is  
623 associated with a selective increase in Fos expression in the output elements of the  
624 hippocampal formation and the perirhinal cortex. *Learning & Memory*, *15*(12), 899–908.  
625 <https://doi.org/10.1101/lm.1196508>
- 626 Weigert, M., Schmidt, U., Haase, R., Sugawara, K., & Myers, G. (2020). Star-convex Polyhedra  
627 for 3D Object Detection and Segmentation in Microscopy. *2020 IEEE Winter Conference on*  
628 *Applications of Computer Vision (WACV)*, 3655–3662.  
629 <https://doi.org/10.1109/WACV45572.2020.9093435>
- 630 Wood, E. R., Dudchenko, P. A., Robitsek, R. J., & Eichenbaum, H. (2000). Hippocampal  
631 Neurons Encode Information about Different Types of Memory Episodes Occurring in the Same  
632 Location. *Neuron*, *27*(3), 623–633. [https://doi.org/10.1016/S0896-6273\(00\)00071-4](https://doi.org/10.1016/S0896-6273(00)00071-4)
- 633 Xavier, G. F., & Costa, V. C. I. (2009). Dentate gyrus and spatial behaviour. *Progress in Neuro-*  
634 *Psychopharmacology and Biological Psychiatry*, *33*(5), 762–773.  
635 <https://doi.org/10.1016/j.pnpbp.2009.03.036>
- 636 Xavier, G. F., Oliveira-Filho, F. J. B., & Santos, A. M. G. (1999). Dentate gyrus-selective  
637 colchicine lesion and disruption of performance in spatial tasks: Difficulties in “place strategy”  
638 because of a lack of flexibility in the use of environmental cues? *Hippocampus*, *9*(6), 668–681.  
639 [https://doi.org/10.1002/\(SICI\)1098-1063\(1999\)9:6<668::AID-HIPO8>3.0.CO;2-9](https://doi.org/10.1002/(SICI)1098-1063(1999)9:6<668::AID-HIPO8>3.0.CO;2-9)
- 640 Zaki, Y., Mau, W., Cincotta, C., Monasterio, A., Odom, E., Doucette, E., Grella, S. L., Merfeld,  
641 E., Shpokayte, M., & Ramirez, S. (2022). Hippocampus and amygdala fear memory engrams  
642 re-emerge after contextual fear relapse. *Neuropsychopharmacology*, *47*(11), 1992–2001.  
643 <https://doi.org/10.1038/s41386-022-01407-0>

644
